# Supplementary material for: Gene expression analysis reveals important pathways for drought response in leaves and roots of a wheat cultivar adapted to rainfed cropping in the Cerrado biome
Source: PubMed Central journal article supplement (PMC5127152; doi:10.1590/1678-4685-gmb-2015-0327), 2016-10-20
Supplement: 1415-4757-gmb-1678-4685-GMB-2015-0327-Suppl06.pdf [file 1415-4757-gmb-1678-4685-GMB-2015-0327-Suppl06.pdf]

**Table S2** - Group of transcripts used in validation by RT-qPCR.

| Primer | Isotig            | Primer F                 | Primer R                 | Expression | Annotation                                                                                                                                    |
|--------|-------------------|--------------------------|--------------------------|------------|-----------------------------------------------------------------------------------------------------------------------------------------------|
| R1     | isotig 15618      | GCGCGAGAACTAAAACGAC      | CTCCCCACCACCGACTACTA     | down       | AT2G36830 - gamma-tip - gamma tonoplast intrinsic protein 1– "water channel activity" - "water transport" - "urea transport"                  |
| R3     | isotig 08533      | GAAAGCACAGCAACAACAGG     | TCGCGTGTATTAAGACTCCAGTG  | down       | AT4G23400 - PIP1.5 - plasma membrane intrinsic protein 1;5 - "water channel activity"                                                         |
| R6     | isotig 12220      | AGCTACAAGGAGCCTGACA      | CAAATTTTTCCCGCAGTCAT     | down       | AT5G14420 - RGLG2 - ring domain ligase2 - "ubiquitin-protein ligase activity" - "negative regulation of response to water deprivation"        |
| R8     | isotig 04932      | ATGCTACGGTTCATGTGCAA     | ACATGGGAGGAACAGAATGC     | up         | AT2G37770 - ChiAKR - "aldo-keto reductase (NADP) activity" - "response to water deprivation"                                                  |
| R13    | isotigs 08385/6   | GGCCAAGTGTGCTAGTTC       | ACACAACCCCTGGACACACA     | up         | AT1G01470 - LEA14 - "response to desiccation"                                                                                                 |
| R15    | isotig 08654      | CTTGCTCTTGACCCCAATC      | GGTCGAGATCGAGATGGAGA     | up         | AT1G04560 - molecular function unknown                                                                                                        |
| R17    | isotig 09327      | TTCTTTTTGGCAGGGACACT     | CTTCGTCGAAGCAGACATTG     | up         | AT1G04560 - molecular function unknown                                                                                                        |
| R19    | isotig 09284      | GTCTGACCGTCTTTGAGCTTTTA  | GCAGCACATGCACAGGAA       | up         | AT1G04560 - molecular function unknown                                                                                                        |
| R21    | isotig 19917      | TAGCGATCGACCTGTGTCTG     | CGCCGATATTTATCCCGTA      | up         | Dehydrin DHN1 - "cellular response to water deprivation"                                                                                      |
| R22    | isotig 07281      | TGCATGAAGGCAGGTACGA      | TGCCGACGTCGTGATATTT      | up         | AT3G21000 - "molecular function"                                                                                                              |
| R24    | isotig 11306      | GAGACAAGTCCCGTGTGGT      | CCCCACGAGAACTTTAACA      | up         | AT2G39800 - P5CS1 Delta1-Pyrroline-5-Carboxylate Synthase 1 - "proline biosynthetic process" - "response to water deprivation"                |
| R28    | isotig 04456      | GCGGTGGTGGTGGTCA         | CTCTCATCTCTCGATCAATGTCTC | up         | AT3G57520 - SIP2 - "response to oxidative stress" - "galactinol-sucrose galactosyltransferase activity"                                       |
| R33    | isotig 06719      | TTTTCGCGTACGGGACTATC     | CCATGGACGTCGTGATACCTG    | up         | No hit                                                                                                                                        |
| R34    | isotig 15379      | AGCGGGATCATGTATGGAAG     | CGCCATATGCGGTAATAGGT     | up         | No hit                                                                                                                                        |
| R36    | isotig 16364      | GACGAGTACACTTGCTGGA      | CGCCGACTACTGAAAACTC      | down       | AT4G01470 - TIP1.3Tonoplast intrinsic protein 1;3 - "water transport" - "urea transport"                                                      |
| L1     | isotig 09384      | GTCCACAGCCTTGTGAGGT      | AAGAGCTCGAGGAGGAGGAG     | up         | No hit                                                                                                                                        |
| L2     | isotig 02373      | GCTTCATGCAGGAAAGACAA     | ACATTGCGAGTGTGAACTG      | up         | AT4G02280 - SUS3 - "sucrose biosynthetic process"                                                                                             |
| L3     | isotig 02886/7    | ATGGCAGGACCTTAGTCCT      | TCTCAGACCCGAAATGCTG      | up         | AT5G50920 - CLPC1 - "regulation of chlorophyll biosynthetic process"                                                                          |
| L4     | isotig 05427      | GATTCTGCCTCAACCTTC       | CTGGGACGGTCTCTATCAA      | up         | DAA1 "DUO1-activated ATPase 1" - "nucleotide binding"                                                                                         |
| L6     | isotig 19351      | GATTGCGGTTCAAGTTGGCTA    | ACGGAGGTGAGAGTCGAATG     | up         | No hit                                                                                                                                        |
| L7     | isotig 02194      | AATTTGTTTGTAGTCCCTTGAGC  | GCAGCGACCTTCACCATT       | down       | AT1G73010 - PS2 - "phosphate starvation-induced gene 2"                                                                                       |
| L8     | isotigs 03192/3   | GCTGAAGCCTTGACAAAAG      | TGTACAACCAGCTGCCAGAG     | up         | AT1G74920 - ALDH10A8 - "response to water deprivation"                                                                                        |
| L9     | isotig 03016      | GGCTCGTATGCTGTTTCGT      | TTACACAAACCTGAAACCTGTG   | up         | AT2G19900 - NADP-ME1                                                                                                                          |
| L10    | isotig 13697      | CGCGTATCAGTGTGACAGTC     | TGTCACGGTCGGGAGATAAT     | up         | AT5G06760 - LEA4-5 - "response to osmotic stress" - "response to water deprivation"                                                           |
| L11    | isotig 03896      | CCTGGATTCTGCTGGTCTTT     | CTAACGAAGACGCACACTCG     | down       | AT5G60660 - PIP2.4 - "water channel activity" - "hydrogen peroxide transmembrane transport"                                                   |
| L13    | isotig 00436/7/8  | TTGGCGAATACCACATACGA     | CTGGCTTCAAGGAATGGAA      | up         | AT3G18000 - XPL1 - "post-embryonic root development"                                                                                          |
| L14    | isotig 03490/1    | GTCCCTCCAGTCGAAGTCCT     | TCACCAAGTTCTCCGACCTC     | up         | AT4G39090 - RD19 - "response to desiccation"                                                                                                  |
| L15    | isotigs 02086/7/8 | GTCCGTTGTGTCCCTTTTT      | GCAGTCTGGCAAAATTAAGC     | up         | AT2G29380 - HAI3 - "highly ABA-induced PP2C gene 3" - AT3G11410 - PP2CA - "response to water deprivation" - "regulation of stomatal movement" |
| L16    | isotig 11547      | CCGTGTATGTGTGGTCCTTG     | TTTATGCACACGCCCTAAT      | up         | No hit                                                                                                                                        |
| L17    | isotig 07408      | AGTCAGAGGTGCTCTTCGT      | GCGTTCAACCATACAAGCAA     | down       | AT2G34420 - LHB1B2 - "photosynthesis, light harvesting in photosystem II"                                                                     |
| L19    | isotig 00436/7/8  | ATGATGAGCCCAAGTTACGG     | TTCTTCTTTGGCACCTACGG     | up         | AT3G18000 - XPL1 - "phosphoethanolamine N-methyltransferase activity"                                                                         |
| L23    | isotig 02266      | GTAGGGATTGCTCTTCTTC      | GGAACGGGAACCTTGACAAAC    | down       | AT4G25480 - DREB1A - "sequence-specific DNA binding transcription factor activity" - "response to water deprivation"                          |
| L25    | isotig 01879      | ACTGTAGAATTGCATCGGTACATC | TTACAGGTGCTCTTTGCCATA    | up         | AT2G39800 - P5CS1 - "proline biosynthetic process" - "response to water deprivation"                                                          |
| L28    | isotig 01300/1/2  | ATGTTCCCTTGGCCATCACCC    | AGACAGTCCCTGCCAAGT       | up         | AT2G05710 - ACO3 - "response to oxidative stress" - "citrate metabolic process"                                                               |
| L29    | isotig 02920      | CATTGGCAATTGGTCGTCT      | CGGGAGTACGAGTAAGGAT      | up         | AT2G39800 - P5CS1 - "proline biosynthetic process" - "response to water deprivation"                                                          |

Primers starting with "R" indicates sequences from roots and starting with "L" indicates sequences from leaf tissue.

"Expression" refers to the increase (up) or decrease (down) in the number of transcripts detected in the drought stressed treatment in comparison to the control, as obtained by the 454 sequencing.
