# Supplementary material for: Gene expression analysis reveals important pathways for drought response in leaves and roots of a wheat cultivar adapted to rainfed cropping in the Cerrado biome
Source: PubMed Central journal article supplement (PMC5127152; doi:10.1590/1678-4685-gmb-2015-0327), 2016-10-20
Supplement: 1415-4757-gmb-1678-4685-GMB-2015-0327-Suppl07.pdf [file 1415-4757-gmb-1678-4685-GMB-2015-0327-Suppl07.pdf]

**Table S3** - Biological pathways activated in wheat under drought resulted from Blast2GO analysis against the Kyoto Encyclopedia of genes and Genomes (KEGG). #Seqs: number of sequences in that pathway; #Enzs: number of enzymes corresponding to the sequences.

| #  | Pathways                                    | Total |       | Root  |       | Leaf  |       | Root and Leaf |       |
|----|---------------------------------------------|-------|-------|-------|-------|-------|-------|---------------|-------|
|    |                                             | #Seqs | #Enzs | #Seqs | #Enzs | #Seqs | #Enzs | #Seqs         | #Enzs |
| 1  | Starch and sucrose metabolism               | 152   | 30    | 67    | 18    | 42    | 12    | 43            | 25    |
| 2  | Carbon fixation in photosynthetic organisms | 113   | 18    | 18    | 7     | 75    | 14    | 20            | 12    |
| 3  | Glyoxylate and dicarboxylate metabolism     | 86    | 12    | 14    | 3     | 58    | 10    | 14            | 7     |
| 4  | Phenylpropanoid biosynthesis                | 85    | 9     | 67    | 6     | 7     | 6     | 11            | 6     |
| 5  | Glycolysis/Gluconeogenesis                  | 71    | 21    | 14    | 8     | 28    | 11    | 29            | 17    |
| 6  | Galactose metabolism                        | 67    | 13    | 24    | 7     | 15    | 6     | 28            | 12    |
| 7  | Phenylalanine metabolism                    | 67    | 9     | 53    | 5     | 3     | 4     | 11            | 7     |
| 8  | Purine metabolism                           | 66    | 16    | 19    | 6     | 23    | 10    | 24            | 13    |
| 9  | Pentose phosphate pathway                   | 59    | 11    | 19    | 6     | 21    | 8     | 19            | 9     |
| 10 | Glutathione metabolism                      | 56    | 14    | 21    | 6     | 12    | 4     | 23            | 12    |
| 11 | Fructose and mannose metabolism             | 53    | 14    | 8     | 5     | 28    | 10    | 17            | 13    |
| 12 | Methane metabolism                          | 51    | 11    | 12    | 5     | 22    | 7     | 17            | 9     |
| 13 | Glycerophospholipid metabolism              | 51    | 10    | 16    | 9     | 22    | 3     | 13            | 6     |
| 14 | Aminobenzoate degradation                   | 50    | 5     | 35    | 3     | 6     | 2     | 9             | 2     |
| 15 | Cysteine and methionine metabolism          | 44    | 16    | 17    | 7     | 8     | 4     | 19            | 15    |
| 16 | Nitrogen metabolism                         | 43    | 11    | 23    | 9     | 9     | 7     | 11            | 6     |
| 17 | Pyruvate metabolism                         | 41    | 15    | 17    | 10    | 11    | 7     | 13            | 10    |
| 18 | Porphyrin and chlorophyll metabolism        | 41    | 11    | 1     | 1     | 33    | 7     | 7             | 8     |
| 19 | Tryptophan metabolism                       | 41    | 5     | 35    | 3     | 3     | 2     | 3             | 2     |
| 20 | Carotenoid biosynthesis                     | 41    | 4     | 32    | 3     | 6     | 3     | 3             | 2     |
| 21 | Arginine and proline metabolism             | 38    | 14    | 11    | 5     | 12    | 7     | 15            | 9     |
| 22 | Glycine, serine and threonine metabolism    | 34    | 11    | 7     | 4     | 12    | 7     | 15            | 8     |
| 23 | Pentose and glucuronate interconversions    | 34    | 8     | 14    | 4     | 13    | 5     | 7             | 6     |
| 24 | Alanine, aspartate and glutamate metabolism | 33    | 10    | 17    | 8     | 5     | 5     | 11            | 8     |
| 25 | Toluene degradation                         | 33    | 2     | 32    | 2     | -     | -     | 1             | 1     |
| 26 | Xylene degradation                          | 33    | 2     | 32    | 2     | -     | -     | 1             | 1     |
| 27 | Amino sugar and nucleotide sugar metabolism | 32    | 16    | 6     | 5     | 8     | 5     | 18            | 15    |
| 28 | Glycerolipid metabolism                     | 28    | 9     | 10    | 6     | 5     | 3     | 13            | 7     |
| 29 | Carbon fixation pathways in prokaryotes     | 27    | 8     | 14    | 5     | 5     | 3     | 8             | 5     |
| 30 | Cyanoamino acid metabolism                  | 27    | 4     | 14    | 2     | 8     | 2     | 5             | 4     |
| 31 | Thiamine metabolism                         | 27    | 3     | 10    | 3     | 10    | 1     | 7             | 3     |
| 32 | Ascorbate and aldarate metabolism           | 24    | 7     | 11    | 3     | 6     | 3     | 7             | 5     |
| 33 | Citrate cycle (TCA cycle)                   | 22    | 9     | 8     | 4     | 7     | 3     | 7             | 5     |
| 34 | Oxidative phosphorylation                   | 22    | 5     | 9     | 3     | 6     | 3     | 7             | 4     |
| 35 | One carbon pool by folate                   | 20    | 5     | 7     | 4     | 5     | 2     | 8             | 4     |
| 36 | Drug metabolism - cytochrome P450           | 20    | 3     | 8     | 1     | 3     | 1     | 9             | 3     |

| #  | Pathways                                            | Total |       | Root  |       | Leaf  |       | Root and Leaf |       |
|----|-----------------------------------------------------|-------|-------|-------|-------|-------|-------|---------------|-------|
|    |                                                     | #Seqs | #Enzs | #Seqs | #Enzs | #Seqs | #Enzs | #Seqs         | #Enzs |
| 37 | Metabolism of xenobiotics by cytochrome P450        | 20    | 3     | 8     | 1     | 3     | 1     | 9             | 3     |
| 38 | Alpha-linolenic acid metabolism                     | 19    | 6     | 9     | 4     | 6     | 1     | 4             | 3     |
| 39 | Inositol phosphate metabolism                       | 18    | 7     | 7     | 2     | 6     | 5     | 5             | 3     |
| 40 | Sulfur metabolism                                   | 18    | 6     | 5     | 2     | 8     | 4     | 5             | 6     |
| 41 | Riboflavin metabolism                               | 17    | 3     | 5     | 1     | 4     | 1     | 8             | 3     |
| 42 | Linoleic acid metabolism                            | 17    | 3     | 7     | 2     | 6     | 1     | 4             | 2     |
| 43 | Drug metabolism - Other enzymes                     | 17    | 2     | -     | -     | 11    | 2     | 6             | 2     |
| 44 | Ether lipid metabolism                              | 16    | 2     | 4     | 2     | 8     | 1     | 4             | 2     |
| 45 | Beta-alanine metabolism                             | 15    | 6     | 6     | 2     | 4     | 3     | 5             | 4     |
| 46 | Selenocompound metabolism                           | 15    | 4     | 5     | 3     | 6     | 2     | 4             | 3     |
| 47 | Valine, leucine and isoleucine degradation          | 14    | 8     | 5     | 3     | 5     | 3     | 4             | 3     |
| 48 | Terpenoid backbone biosynthesis                     | 14    | 6     | 9     | 4     | 2     | 1     | 3             | 3     |
| 49 | Tyrosine metabolism                                 | 14    | 6     | 7     | 3     | 2     | 1     | 5             | 6     |
| 50 | Other glycan degradation                            | 13    | 3     | 11    | 3     | -     | -     | 2             | 1     |
| 51 | Phosphatidylinositol signaling system               | 12    | 6     | 3     | 2     | 2     | 2     | 7             | 4     |
| 52 | Butanoate metabolism                                | 12    | 4     | 6     | 3     | 3     | 3     | 3             | 4     |
| 53 | Propanoate metabolism                               | 9     | 6     | 3     | 2     | 2     | 1     | 4             | 4     |
| 54 | Streptomycin biosynthesis                           | 9     | 4     | -     | -     | 3     | 2     | 6             | 3     |
| 55 | Fatty acid degradation                              | 8     | 6     | 1     | 1     | 2     | 1     | 5             | 4     |
| 56 | Fatty acid biosynthesis                             | 8     | 5     | 3     | 2     | 1     | 1     | 4             | 4     |
| 57 | Taurine and hypotaurine metabolism                  | 8     | 3     | 5     | 2     | 1     | 1     | 2             | 2     |
| 58 | Photosynthesis                                      | 8     | 2     | 1     | 1     | 5     | 2     | 3             | 2     |
| 59 | Glycosphingolipid biosynthesis - globo series       | 8     | 2     | 2     | 1     | 1     | 1     | 5             | 2     |
| 60 | Sphingolipid metabolism                             | 8     | 2     | 3     | 2     | 1     | 1     | 4             | 1     |
| 61 | Biosynthesis of ansamycins                          | 8     | 1     | 3     | 1     | 1     | 1     | 4             | 1     |
| 62 | Ubiquinone and other terpenoid-quinone biosynthesis | 7     | 3     | 6     | 2     | -     | -     | 1             | 1     |
| 63 | Flavonoid biosynthesis                              | 6     | 3     | 4     | 1     | 2     | 2     | -             | -     |
| 64 | Lysine degradation                                  | 6     | 3     | 3     | 1     | 2     | 1     | 1             | 1     |
| 65 | Pyrimidine metabolism                               | 6     | 3     | -     | -     | 3     | 1     | 3             | 2     |
| 66 | Arachidonic acid metabolism                         | 6     | 3     | 1     | 1     | -     | -     | 5             | 3     |
| 67 | Phenylalanine, tyrosine and tryptophan biosynthesis | 5     | 6     | 2     | 1     | -     | -     | 3             | 6     |
| 68 | Biosynthesis of unsaturated fatty acids             | 5     | 4     | 3     | 2     | -     | -     | 2             | 2     |
| 69 | Caffeine metabolism                                 | 5     | 3     | -     | -     | 1     | 1     | 4             | 3     |
| 70 | Retinol metabolism                                  | 5     | 3     | 2     | 1     | -     | -     | 3             | 2     |
| 71 | Steroid hormone biosynthesis                        | 5     | 2     | 2     | 1     | -     | -     | 3             | 2     |
| 72 | Nicotinate and nicotinamide metabolism              | 5     | 2     | 2     | 2     | -     | -     | 3             | 1     |
| 73 | Biosynthesis of terpenoids and steroids             | 5     | 1     | 2     | 1     | 3     | 1     | -             | -     |
| 74 | Biotin metabolism                                   | 4     | 2     | 2     | 1     | -     | -     | 2             | 2     |
| 75 | Steroid biosynthesis                                | 4     | 2     | -     | -     | 2     | 2     | 2             | 2     |
| 76 | Caprolactan degradation                             | 4     | 1     | 3     | 1     | -     | -     | 1             | 1     |

| #   | Pathways                                                              | Total |       | Root  |       | Leaf  |       | Root and Leaf |       |
|-----|-----------------------------------------------------------------------|-------|-------|-------|-------|-------|-------|---------------|-------|
|     |                                                                       | #Seqs | #Enzs | #Seqs | #Enzs | #Seqs | #Enzs | #Seqs         | #Enzs |
| 77  | T cell receptor signaling pathway                                     | 4     | 1     | 2     | 1     | -     | -     | 2             | 1     |
| 78  | Chloroalkane and chloroalkene degradation                             | 3     | 2     | -     | -     | 2     | 1     | 1             | 1     |
| 79  | Aminoacyl-tRNA biosynthesis                                           | 3     | 2     | 2     | 1     | -     | -     | 1             | 1     |
| 80  | N-Glycan biosynthesis                                                 | 3     | 2     | -     | -     | 2     | 2     | 1             | 1     |
| 81  | Histidine metabolism                                                  | 3     | 2     | -     | -     | 2     | 1     | 1             | 1     |
| 82  | Betalain biosynthesis                                                 | 3     | 1     | 2     | 1     | -     | -     | 1             | 1     |
| 83  | D-glutamine and D-glutamate metabolism                                | 3     | 1     | 3     | 1     | -     | -     | -             | -     |
| 84  | Valine, leucine and isoleucine biosynthesis                           | 2     | 2     | 1     | 1     | -     | -     | 1             | 1     |
| 85  | mTOR signaling pathway                                                | 2     | 1     | 1     | 1     | 1     | 1     | -             | -     |
| 86  | Limonene and pinene degradation                                       | 2     | 1     | -     | -     | 2     | 1     | -             | -     |
| 87  | Other types of O-glycan biosynthesis                                  | 2     | 1     | 2     | 1     | -     | -     | -             | -     |
| 88  | Glycosaminoglycan biosynthesis - heparan sulfate/heparin              | 2     | 1     | 2     | 1     | -     | -     | -             | -     |
| 89  | Glycosaminoglycan biosynthesis - chondroitin sulfate/dermatan sulfate | 2     | 1     | 2     | 1     | -     | -     | -             | -     |
| 90  | Zeatin biosynthesis                                                   | 1     | 2     | 1     | 2     | -     | -     | -             | -     |
| 91  | Tropane, piperidine and pyridine alkaloid biosynthesis                | 1     | 2     | -     | -     | -     | -     | 1             | 2     |
| 92  | Isoquinoline alkaloid biosynthesis                                    | 1     | 2     | -     | -     | -     | -     | 1             | 2     |
| 93  | Novobiocin biosynthesis                                               | 1     | 2     | -     | -     | -     | -     | 1             | 2     |
| 94  | Naphthalene degradation                                               | 1     | 1     | -     | -     | -     | -     | 1             | 1     |
| 95  | Stilbenoid, diarylheptanoid and gingerol biosynthesis                 | 1     | 1     | -     | -     | 1     | 1     | -             | -     |
| 96  | Lysine biosynthesis                                                   | 1     | 1     | -     | -     | -     | -     | 1             | 1     |
| 97  | Benzoate degradation                                                  | 1     | 1     | 1     | 1     | -     | -     | -             | -     |
| 98  | Synthesis and degradation of ketone bodies                            | 1     | 1     | -     | -     | -     | -     | 1             | 1     |
| 99  | Biosynthesis of vancomycin group antibiotics                          | 1     | 1     | -     | -     | -     | -     | 1             | 1     |
| 100 | Butirosin and neomycin biosynthesis                                   | 1     | 1     | -     | -     | -     | -     | 1             | 1     |
| 101 | Polyketide sugar unit biosynthesis                                    | 1     | 1     | -     | -     | -     | -     | 1             | 1     |
| 102 | Pantothenate and CoA biosynthesis                                     | 1     | 1     | -     | -     | -     | -     | 1             | 1     |
| 103 | Diterpenoid biosynthesis                                              | 1     | 1     | 1     | 1     | -     | -     | -             | -     |
| 104 | Indole alkaloid biosynthesis                                          | 1     | 1     | -     | -     | -     | -     | 1             | 1     |
| 105 | Styrene degradation                                                   | 1     | 1     | 1     | 1     | -     | -     | -             | -     |
| 106 | Ethylbenzene degradation                                              | 1     | 1     | 1     | 1     | -     | -     | -             | -     |
| 107 | Fatty acid elongation                                                 | 1     | 1     | 1     | 1     | -     | -     | -             | -     |
| 108 | Various types of N-glycan biosynthesis                                | 1     | 1     | -     | -     | 1     | 1     | -             | -     |
| 109 | Aflatoxin biosynthesis                                                | 1     | 1     | -     | -     | -     | -     | 1             | 1     |
| 110 | Tetracycline biosynthesis                                             | 1     | 1     | -     | -     | -     | -     | 1             | 1     |
| 111 | Geraniol degradation                                                  | 1     | 1     | 1     | 1     | -     | -     | -             | -     |
| 112 | Primary bile acid biosynthesis                                        | 1     | 1     | -     | -     | 1     | 1     | -             | -     |
| 113 | Glycosphingolipid biosynthesis - ganglio series                       | 1     | 1     | 1     | 1     | -     | -     | -             | -     |
| 114 | Glycosphingolipid biosynthesis - lacto and neo-lactoseries            | 1     | 1     | -     | -     | -     | -     | 1             | 1     |
| 115 | C-5branched dibasic acid metabolism                                   | 1     | 1     | -     | -     | -     | -     | 1             | 1     |
| 116 | Glycosaminoglycan degradation                                         | 1     | 1     | 1     | 1     | -     | -     | -             | -     |
