# Supplementary material for: Gene expression analysis reveals important pathways for drought response in leaves and roots of a wheat cultivar adapted to rainfed cropping in the Cerrado biome
Source: PubMed Central journal article supplement (PMC5127152; doi:10.1590/1678-4685-gmb-2015-0327), 2016-10-20
Supplement: 1415-4757-gmb-1678-4685-GMB-2015-0327-Suppl08.pdf [file 1415-4757-gmb-1678-4685-GMB-2015-0327-Suppl08.pdf]

**Table S4** - Details of selected candidate genes identified in the wheat cultivar MGS1 Aliança under drought stress.

| Tissue        | Expression  | Gene      | Isotig                                                                   | TAIR locus* <sup>1</sup>         | Class                              |
|---------------|-------------|-----------|--------------------------------------------------------------------------|----------------------------------|------------------------------------|
| Root          | up          | DHN1      | isotigs 21944, 19917 and 22422                                           | UNIPROTKB A8CVF3                 | Dehydrin                           |
| Leaf          | down        | DHN1      | isotigs 12334 and 12047                                                  | UNIPROTKB A8CVF3                 | Dehydrin                           |
| Root          | down        | ERD9      | isotigs 18701, 19352, 09429 and 18313                                    | TAIR locus:2012773 - "AT1G10370" | GST* <sup>2</sup>                  |
| Leaf          | up          | ERD9      | isotigs 02218 and 02219                                                  | TAIR locus:2012773 - "AT1G10370" | GST                                |
| Root          | down        | GGT1      | isotigs 07897 and 07898                                                  | TAIR locus:2135212 - "AT4G39640" | GST                                |
| Root          | up and down | ATGSTF13  | isotigs 04717, 04718, 04719, 04720, 14807, 14782, 18016, 09789 and 09790 | TAIR locus:2081695 - "AT3G62760" | GST                                |
| Root          | up          | GSH1      | isotigs 04750 and 04751                                                  | TAIR locus:2127173 - "AT4G23100" | GST                                |
| Root          | down        | GSTU18    | isotig 09430                                                             | TAIR locus:2012758 - "AT1G10360" | GST                                |
| Root          | up and down | ATGSTF13  | isotigs 04117, 04118, 04119, 04120, 14782, 18016, 09789 and 09790        | TAIR locus:2081695 - "AT3G62760" | GST                                |
| Root          | down        | GSTU25    | isotig 16756                                                             | TAIR locus:2020312 - "AT1G17180" | GST                                |
| Root          | down        | AT1G65820 | isotig 21972                                                             | TAIR locus:2018566 - "AT1G65820" | GST                                |
| Root          | up          | OXP1      | isotigs 06621 and 06622                                                  | TAIR locus:2156030 - "AT5G37830" | GST                                |
| Root          | up          | GSTL3     | isotig 16495                                                             | TAIR locus:2151326               | GST                                |
| Leaf          | up          | GSTL3     | isotig 07806                                                             | TAIR locus:2151326               | GST                                |
| Leaf          | up          | GR1       | isotigs 00610, 00611, 00612, 00613, 00614 and 00615                      | TAIR locus:2093691               | GST                                |
| Leaf          | up          | AtLEA4-1  | isotigs 04918 and 04919                                                  | TAIR locus:2206629 - "AT1G32560" | Late embryogenesis abundant        |
| Root          | up          | AtLEA4-1  | isotigs 22882 and 21093                                                  | TAIR locus:2206629 - "AT1G32560" | Late embryogenesis abundant        |
| Root          | up          | LEA14     | isotigs 08385, 08386 and 20485                                           | TAIR locus:2025346 - "AT1G01470" | Late embryogenesis abundant        |
| Leaf          | up          | LEA14     | isotigs 09631, 1144 and 11608                                            | TAIR locus:2025346 - "AT1G01470" | Late embryogenesis abundant        |
| Leaf          | up and down | LEA7      | isotigs 01765, 01766, 01767 and 00921                                    | TAIR locus:2035109 - "AT1G52690" | Late embryogenesis abundant        |
| Root          | up          | LEA7      | isotigs 02966, 02968, 05172, 05173 and 05174                             | TAIR locus:2035109 - "AT1G52690" | Late embryogenesis abundant        |
| Leaf          | up          | LEA       | isotig 11058                                                             | TAIR locus:2050095 - "AT2G21490" | Late embryogenesis abundant        |
| Leaf          | up          | LEA4-5    | isotig 13697                                                             | TAIR locus:2170239 - "AT5G06760" | Late embryogenesis abundant        |
| Root          | up          | AT2G46140 | isotigs 29594 and 21457                                                  | TAIR locus:2062933 - "AT2G46140" | Late embryogenesis abundant        |
| Root          | down        | ACC1      | isotig 00996                                                             | TAIR locus:2034310 - "AT1G36160" | Late embryogenesis abundant        |
| Root          | up          | P5CS1     | isotigs 11387 and 11306                                                  | TAIR locus:2063907 - "AT2G39800" | Proline biosynthesis               |
| Leaf          | up          | P5CS1     | isotigs 01879, 01880, 018881, 02920 and 02921                            | TAIR locus:2063907 - "AT2G39800" | Proline biosynthesis               |
| Leaf          | up          | P5CS2     | isotig 14186                                                             | TAIR locus:2078911               | Proline biosynthesis               |
| Leaf          | up          | ALDH12A1  | isotig 04753                                                             | TAIR locus:2154094 - "AT5G62530" | Proline biosynthesis               |
| Root          | up          | DELTA-OAT | isotig 11923                                                             | TAIR locus:2161398 - "AT5G46180" | Proline biosynthesis               |
| Leaf          | up          | DELTA-OAT | isotigs 01704, 01705, 01706 and 01707                                    | TAIR locus:2161398 - "AT5G46180" | Proline biosynthesis               |
| Leaf          | down        | RCA       | isotigs 02002, 02004, 02003, isoitg00923, 00924 and 00925                | TAIR locus:2063922 - "AT2G39730" | Leaf senescence                    |
| Root          | down        | SAG12     | isotigs 04483, 04485, 12184, 08512, 14879, 14986 and 15605               | TAIR locus:2152445 - "AT5G45890" | Leaf senescence                    |
| Root          | up          | SAG29     | isotigs 12741, 07441 and 07442                                           | TAIR locus:2179867               | Leaf senescence                    |
| Root          | up          | LTI65     | isotigs 05862 and 05863                                                  | TAIR locus:2156652 - "AT5G52300" | Leaf senescence                    |
| Leaf          | up          | LTI65     | isotig 06036                                                             | TAIR locus:2156652 - "AT5G52300" | Leaf senescence                    |
| Leaf          | up          | HAI1      | isotig 03931                                                             | TAIR locus:2168449 - "AT5G59220" | Leaf senescence                    |
| Root          | down        | ARF1      | isotigs 06705 and 06706                                                  | TAIR locus:2025991 - "AT1G59750" | Leaf senescence                    |
| Root          | down        | WRKY70    | isotig 14342                                                             | TAIR locus:2102539 - "AT3G56400" | Leaf senescence                    |
| Root          | down        | OPR1      | isotig 15278                                                             | TAIR locus:2030086 - "AT1G76680" | Leaf senescence                    |
| Leaf          | up          | NCED3     | isotigs 03234 and 03235                                                  | TAIR locus:2091652 - "AT3G14440" | Abscisic acid biosynthetic process |
| Root          | down        | AAO3      | isotigs 00384, 00385, 00386 and 00387                                    | TAIR locus:2045149 - "AT2G27150" | Abscisic acid biosynthetic process |
| Root and leaf | up          | OST1      | isotig 03858                                                             | TAIR locus:2118929 - "AT4G33950" | Response to abscisic acid stimulus |

\*<sup>1</sup> TAIR locus means region corresponding to a single transcription unit in the Arabidopsis genome.

\*<sup>2</sup> GST means glutathione S-transferase and others related to glutathione biosynthesis and catabolism.
